# Supplementary material for: Direct hydroxylation of primary carbons in small alkanes by wild-type cytochrome P450BM3 containing perfluorocarboxylic acids as decoy molecules
Source: Royal Society of Chemistry journal article supplement (doi:10.1039/c3sc50378j), 2013-01-01
Supplement: c3sc50378j.pdf [file c3sc50378j.pdf]

## Electronic Supplementary Information

### Direct hydroxylation of primary carbons in small alkanes by wild-type cytochrome P450BM3 containing perfluorocarboxylic acids as decoy molecules

Norifumi Kawakami<sup>1</sup>, Osami Shoji\*<sup>2</sup> and Yoshihito Watanabe\*<sup>1</sup>

<sup>1</sup>Research Center for Materials Science Nagoya University, Furo-cho, Chikusa-ku, Nagoya, 464-8602, (Japan)

E-mail: p47297a@nucc.cc.nagoya-u.ac.jp

<sup>2</sup> Department of Chemistry, Graduate School of Science, Nagoya University, Furo-cho, Chikusa-ku, Nagoya, 464-8602, (Japan),

E-mail:shoji.osami@a.mbox.nagoya-u.ac.jp

Table of Contents

Supplementary Figure

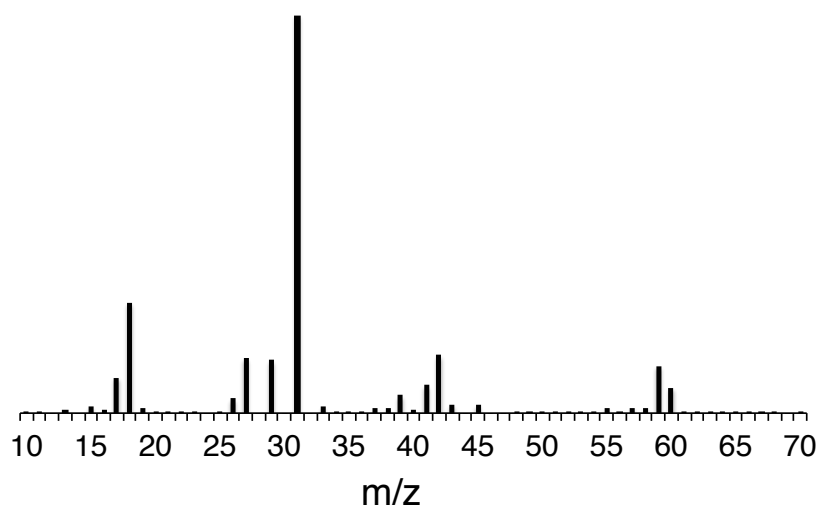

Fig. S1 GC/MS analysis of a product having a same retention time as 1-propanol obtained from the reaction under high-pressure conditions of 0.5MPa of propane. Typical 1-propanol fragment ions having  $m/z$  31 and 42 and molecular ion peak ( $m/z$  60) were observed.
